# Supplementary material for: InN/XS2 (X = Zr, Hf) vdW heterojunctions: promising Z-scheme systems with high hydrogen evolution activity for photocatalytic water splitting
Source: Royal Society of Chemistry journal article supplement (doi:10.1039/d2cp05280f), 2023-01-01
Supplement: d2cp05280f1.pdf [file d2cp05280f1.pdf]

## Supporting Information

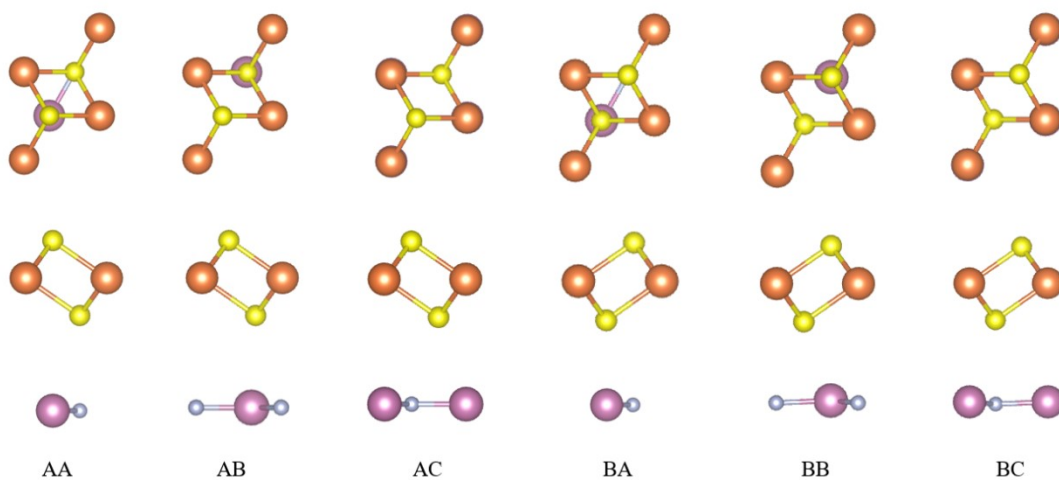

Fig. S1 Six configurations of InN/XS<sub>2</sub> (X=Zr, Hf) heterojunctions

Table S1. Lattice constants, binding energies, and interlayer spacings of six configurations  
for InN/XS<sub>2</sub> (X=Zr, Hf) heterostructures

| Configuration                        | AA     | AB     | AC     | BA     | BB     | BC     |
|--------------------------------------|--------|--------|--------|--------|--------|--------|
| Lattice constant /Å                  | 3.64   | 3.63   | 3.64   | 3.64   | 3.65   | 3.64   |
| E <sub>b</sub> (meV/Å <sup>2</sup> ) | -60.07 | -63.39 | -64.30 | -67.60 | -63.07 | -59.05 |
| Interlayer distance/Å                | 3.25   | 3.11   | 3.09   | 3.05   | 3.09   | 3.35   |

  

| Configuration                        | AA     | AB     | AC     | BA     | BB     | BC     |
|--------------------------------------|--------|--------|--------|--------|--------|--------|
| Lattice constant /Å                  | 3.62   | 3.63   | 3.62   | 3.62   | 3.63   | 3.62   |
| E <sub>b</sub> (meV/Å <sup>2</sup> ) | -70.54 | -73.67 | -74.82 | -77.43 | -74.18 | -69.53 |
| Interlayer distance/Å                | 3.33   | 3.19   | 3.18   | 3.12   | 3.17   | 3.42   |

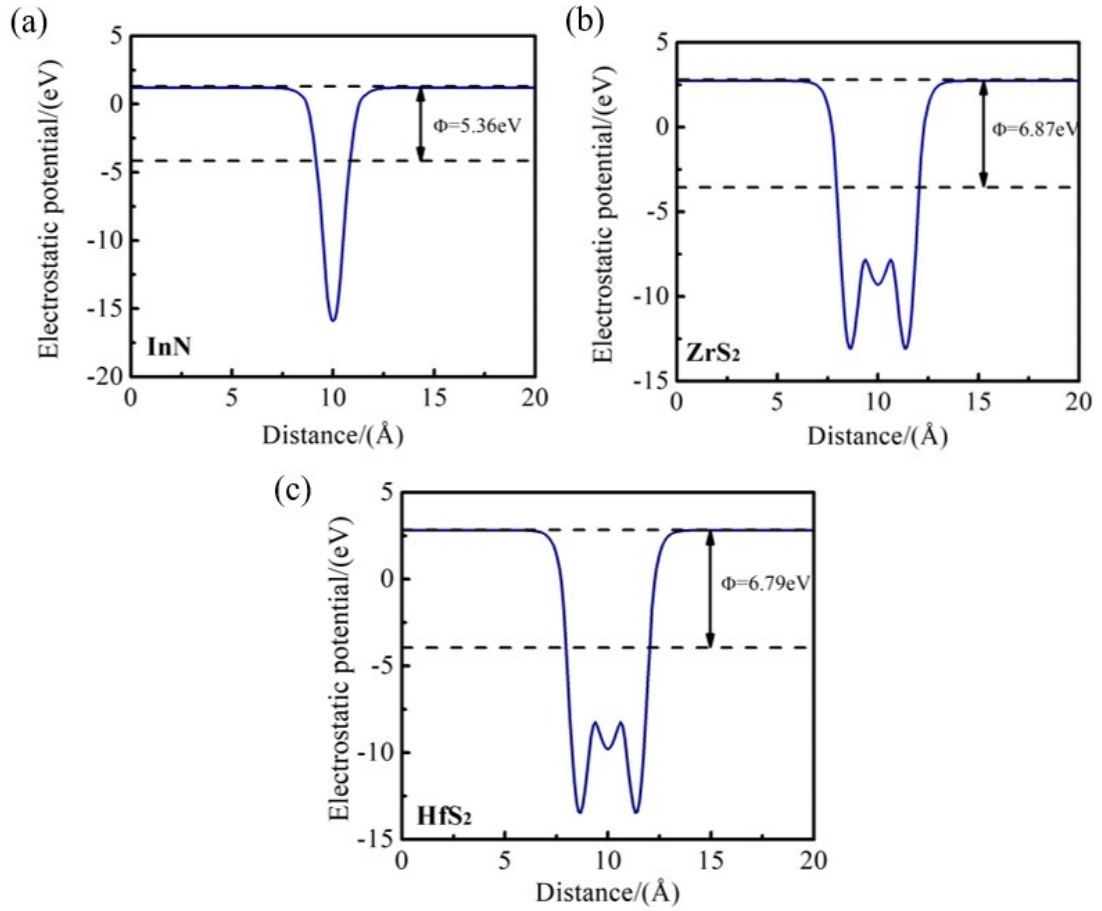

Fig. S2 The variation of Electrostatic potential along z-direction of InN, ZrS<sub>2</sub>, and HfS<sub>2</sub> monolayers

## The HER/OER process

The change in Gibbs free energy in HER and OER are calculated according to the formula,

$$\Delta G = \Delta E + \Delta E_{zpe} - T\Delta S \quad (1)$$

where  $\Delta E$  indicates the change in total energies,  $\Delta E_{zpe}$  and  $\Delta S$  is the change of zero-point energies and entropic contributions, respectively.

The process of HER can be divided into two steps,

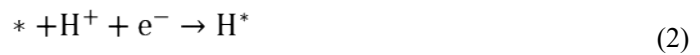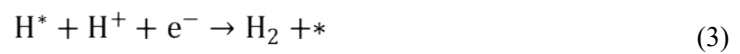

The process of OER can be considered as four steps,

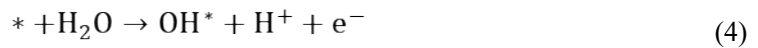

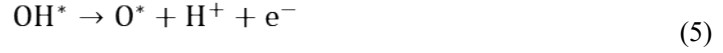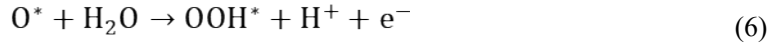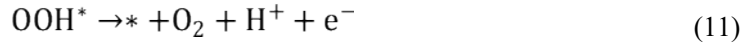

where \* is the adsorbed materials, O\*, OH\*, OOH\* are the adsorbed intermediates of OER, and H\* represents the adsorbed intermediates of HER.

Heteroatom doping is an effective case to improve HER efficiency, which can simultaneously tune the active site and electrochemical surface area (ECSA). Taking InN/ZrS<sub>2</sub> as an example, the HER efficiency of InN doped with a single metal atom was studied by DFT calculation with 4 × 4 × 1 supercell, investigating the substitution of In atoms in InN by different metal atoms. The formation energies of these different structures were firstly calculated to evaluate their structural stability. The formula is  $E_f = E_{tot} - E_{InN} - E_i$ , where  $E_{tot}$  is the total energy of InN doped with metal atoms, and  $E_{InN}$  is the energy of InN with one In vacancy,  $E_i$  is the energy of a metal atom relative to its bulk metal. The calculated results are shown in Table S2. The negative value of the calculated results indicates that the structure can exist stably.

Table S2. Formation energies of structures doped with different metal single atoms

|                  |        |        |        |        |
|------------------|--------|--------|--------|--------|
| Metal            | Cr     | Mo     | W      | Pt     |
| $E_f(\text{eV})$ | -19.78 | -21.91 | -22.71 | -11.69 |
| Metal            | Al     | Ge     | Sn     | Pb     |
| $E_f(\text{eV})$ | -13.42 | -13.16 | -12.22 | -10.43 |

The HER process of the single-metal doped structure was studied, the HER activity was judged by  $\Delta G$ . Fig. S4 shows the HER reaction process on the catalyst.

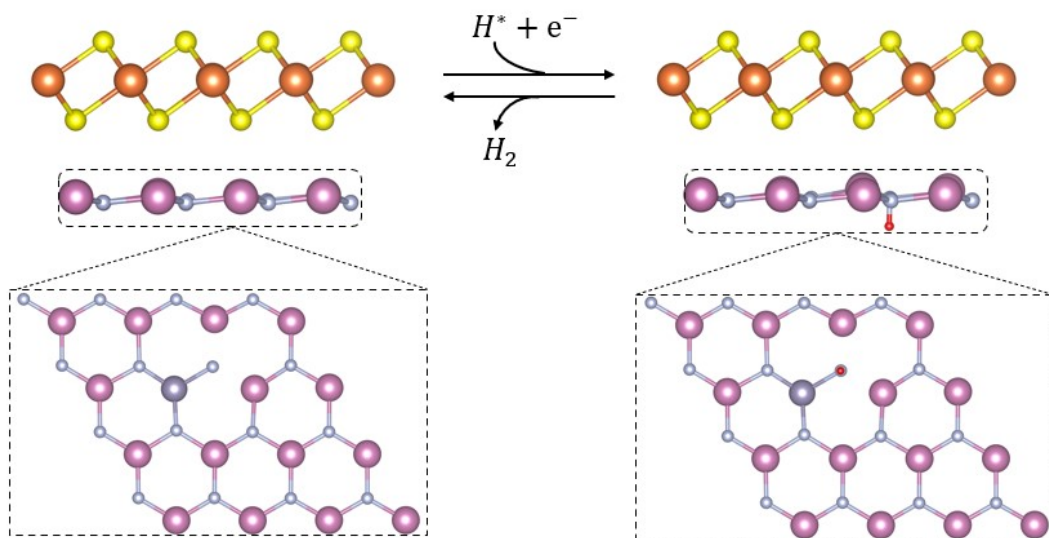

Fig. S4 Adsorption configurations of intermediate species involved in the HER process, the orange, yellow, pink, white, red, and gray atoms represent Zr, S, In, N, H, and doped atoms, respectively

Table S3. The calculated energy barriers at different cut-off energies with k-mesh fixed at  $3 \times 3 \times 1$

| ENCUT (eV)   | 300     | 350     | 400     | 450     | 500     | 520     | 550     | 570     |
|--------------|---------|---------|---------|---------|---------|---------|---------|---------|
| Barrier (eV) | -0.0652 | -0.1052 | -0.1181 | -0.1204 | -0.1231 | -0.1268 | -0.1257 | -0.1232 |
| Difference   | -0.0401 | -0.0129 | -0.0023 | -0.0027 | -0.0037 | 0.0011  | 0.0025  | \       |

Table S4. The calculated energy barriers at different k-mesh with ENCUT fixed at 500 eV

| K-points     | $1 \times 1 \times 1$ | $3 \times 3 \times 1$ | $5 \times 5 \times 1$ | $7 \times 7 \times 1$ |
|--------------|-----------------------|-----------------------|-----------------------|-----------------------|
| Barrier (eV) | -0.1951               | -0.1231               | -0.1233               | -0.1144               |
| Difference   | 0.0720                | -0.0002               | 0.0089                | \                     |
